# Supplementary material for: Integrated Metabolomics and Lipidomics Analysis Reveal Remodeling of Lipid Metabolism and Amino Acid Metabolism in Glucagon Receptor–Deficient Zebrafish
Source: Front Cell Dev Biol. 2021 Jan 14;8:605979. doi: 10.3389/fcell.2020.605979 (PMC7841139; doi:10.3389/fcell.2020.605979)
Supplement: Supplementary Table 1 — Different metabolites in global metabolomics and lipidomics profiling. [file Table_1.XLSX]

## Sheet: Sheet1
Omics	Compound name	Sample	VIP	P value	foldchange	Log2(foldchange)	KEGG ID/LipidMaps ID	HMDB ID	Class
Metabolomics	Vitamine E	gcgr:WT	1.0705	0.00044341	0.625399	-0.677151	C14151	HMDB0002902	Lipids and lipid-like molecules
	Vitamin K oxide	gcgr:WT	1.26118	0.00173457	0.535369	-0.901395	C05849	HMDB0002972	Lipids and lipid-like molecules
	Plastochromanol 3	gcgr:WT	1.35567	0.000655997	0.53181	-0.911016	C14155	HMDB0012958	Lipids and lipid-like molecules
	Oelsaeure	gcgr:WT	1.19806	0.00162945	0.543345	-0.88006	C00712	HMDB0000207	Lipids and lipid-like molecules
	Farnesal	gcgr:WT	1.20359	0.00145611	1.83322	0.87438	C03461	HMDB0060356	Lipids and lipid-like molecules
	Dihydrocortisol	gcgr:WT	1.1681	0.00454289	1.68232	0.750448	C05471	HMDB0003259	Lipids and lipid-like molecules
	Dihomolinolenate	gcgr:WT	1.10709	0.00568916	0.59691	-0.744414	C03242	HMDB0002925	Lipids and lipid-like molecules
	DHEA sulfate	gcgr:WT	1.1153	0.00137688	1.98739	0.990875	C04555	HMDB0001032	Lipids and lipid-like molecules
	docosapentaenoic acid	gcgr:WT	1.38733	0.00366808	0.430562	-1.21571	C16513	HMDB0006528	Lipids and lipid-like molecules
	eicosapentaenoic acid	gcgr:WT	1.3811	0.00642615	0.530148	-0.915533	C06428	HMDB0001999	Lipids and lipid-like molecules
	docosahexaenoic acid	gcgr:WT	1.24489	0.000851831	0.625089	-0.677866	C06429	HMDB0002183	Lipids and lipid-like molecules
	Allopregnane-3alpha,20alpha-diol	gcgr:WT	1.43257	9.7e-06	3.2885	1.71743	C18042	HMDB0060409	Lipids and lipid-like molecules
	8-Isoprostane	gcgr:WT	1.6378	9.25e-06	4.79285	2.26088	C13809	HMDB0005083	Lipids and lipid-like molecules
	7-Hydroxypregnenolone	gcgr:WT	1.19871	0.000653326	2.6321	1.39621	C18038	HMDB0060424	Lipids and lipid-like molecules
	7alpha-OH-DHEA	gcgr:WT	1.12047	0.000885435	0.686604	-0.54245	C18045	HMDB0004611	Lipids and lipid-like molecules
	6-Keto-PGE1	gcgr:WT	1.9689	1.41e-06	3.47777	1.79816	C05962	HMDB0004241	Lipids and lipid-like molecules
	6-Keto-PGF1a	gcgr:WT	1.48978	0.000156997	2.90056	1.53633	C05961	HMDB0002886	Lipids and lipid-like molecules
	5-CTTL	gcgr:WT	1.25566	4.36e-05	0.570432	-0.809874	C05446	HMDB0001231	Lipids and lipid-like molecules
	5alpha-DHP	gcgr:WT	1.18141	0.00260578	0.597368	-0.743309	C03681	HMDB0003759	Lipids and lipid-like molecules
	5,6-Epoxy-atra	gcgr:WT	1.30049	1.03e-05	1.81521	0.860135	C16680	HMDB0012451	Lipids and lipid-like molecules
	2-MeOE2 3g	gcgr:WT	1.80376	0.00572173	0.133295	-2.9073	C11131	HMDB0006765	Lipids and lipid-like molecules
	20-AHAPO	gcgr:WT	1.26503	0.00343166	0.561712	-0.832098	C18041	HMDB0060408	Lipids and lipid-like molecules
	18-Hydroxyretinoate	gcgr:WT	1.19876	0.000915802	1.85686	0.892869	C16679	HMDB0012452	Lipids and lipid-like molecules
	17,21-dihydroxypregnenolone	gcgr:WT	1.13926	0.00330337	0.565195	-0.82318	C05487	HMDB0006762	Lipids and lipid-like molecules
	15-Deoxy-PGJ2	gcgr:WT	1.42255	0.000177238	3.39355	1.7628	C14717	HMDB0005079	Lipids and lipid-like molecules
	13,14-Dihydro-retinol	gcgr:WT	1.24532	0.00342502	0.586613	-0.769519	C15492	HMDB0011618	Lipids and lipid-like molecules
	11beta,17alpha,21-THPREG	gcgr:WT	1.15027	1.34e-05	1.88209	0.912333	C05489	HMDB0006760	Lipids and lipid-like molecules
	Trioxilin B3	gcgr:WT	1.57112	1e-06	2.31285	1.20967	C14811	HMDB0001965	Lipids and lipid-like molecules
	Trioxilin A3	gcgr:WT	1.7311	1.53e-05	2.68831	1.4267	C14809	HMDB0001977	Lipids and lipid-like molecules
	Testosterone	gcgr:WT	1.10764	0.000371825	2.35984	1.23869	C00535	HMDB0000234	Lipids and lipid-like molecules
	Retinol	gcgr:WT	1.02836	0.00417519	0.722035	-0.46986	C00473	HMDB0000305	Lipids and lipid-like molecules
	Prostaglandin G2	gcgr:WT	1.25751	0.000423646	2.29466	1.19828	C05956	HMDB0003235	Lipids and lipid-like molecules
	Prostaglandin E2	gcgr:WT	1.34536	0.000733712	1.911	0.934327	C00584	HMDB0001220	Lipids and lipid-like molecules
	Progesterone	gcgr:WT	1.23955	0.00126917	0.522857	-0.935513	C00410	HMDB0001830	Lipids and lipid-like molecules
	Lipoxin B4	gcgr:WT	1.37322	0.000309211	2.45913	1.29815	C06315	HMDB0005082	Lipids and lipid-like molecules
	Linoleate	gcgr:WT	1.11482	0.00673775	0.630099	-0.66635	C01595	HMDB0000673	Lipids and lipid-like molecules
	Leukotriene B4	gcgr:WT	1.41515	5.16e-05	3.37522	1.75498	C02165	HMDB0001085	Lipids and lipid-like molecules
	Leukotriene A4	gcgr:WT	1.19858	0.0034675	3.66213	1.87268	C00909	HMDB0001337	Lipids and lipid-like molecules
	Icosenoic acid	gcgr:WT	1.0931	0.0046933	0.605118	-0.724713	C16526	HMDB0002231	Lipids and lipid-like molecules
	eicosatrienoic acid	gcgr:WT	1.083	0.00615189	0.63347	-0.658653	C16522	HMDB0060039	Lipids and lipid-like molecules
	Icosadienoic acid	gcgr:WT	1.29043	0.000642034	0.58359	-0.776973	C16525	HMDB0005060	Lipids and lipid-like molecules
	Farnesylcysteine	gcgr:WT	1.70735	0.00247033	0.135146	-2.8874	C19691	HMDB0011627	Lipids and lipid-like molecules
	Etiocholanolone	gcgr:WT	1.11493	2.7e-06	1.48678	0.572194	C04373	HMDB0000490	Lipids and lipid-like molecules
	Estradiol-17beta	gcgr:WT	1.17877	0.00013401	0.653099	-0.614626	C00951	HMDB0000151	Lipids and lipid-like molecules
	Dodecanoic acid	gcgr:WT	1.38782	0.00565074	2.51682	1.3316	C02679	HMDB0000638	Lipids and lipid-like molecules
	Behenic acid	gcgr:WT	1.15641	0.00172793	1.76756	0.821758	C08281	HMDB0000944	Lipids and lipid-like molecules
	Chenodeoxycholate	gcgr:WT	1.58036	0.00111485	0.342149	-1.5473	C02528	HMDB0000518	Lipids and lipid-like molecules
	Calcitriol	gcgr:WT	1.23764	4.1e-05	1.66589	0.736297	C01673	HMDB0001903	Lipids and lipid-like molecules
	Arachidonate	gcgr:WT	1.40561	0.00258578	0.525709	-0.927664	C00219	HMDB0001043	Lipids and lipid-like molecules
	Allopregnanolone	gcgr:WT	1.60809	0.00496839	0.399934	-1.32217	C13712	HMDB0001449	Lipids and lipid-like molecules
	Adrenic acid	gcgr:WT	1.60711	0.00137133	0.405348	-1.30277	C16527	HMDB0002226	Lipids and lipid-like molecules
	9-OxoODE	gcgr:WT	1.55652	0.00106965	0.338611	-1.5623	C14766	HMDB0004669	Lipids and lipid-like molecules
	9-cis-Retinal	gcgr:WT	1.6641	0.000261521	0.407328	-1.29574	C16681	HMDB0006218	Lipids and lipid-like molecules
	9(S)-HODE	gcgr:WT	1.54908	0.00238634	0.352945	-1.50248	C14767	HMDB0004670	Lipids and lipid-like molecules
	5-Dehydroepisterol	gcgr:WT	1.02276	0.00207125	1.59977	0.677861	C15780	HMDB0006848	Lipids and lipid-like molecules
	5(S)-HPETE	gcgr:WT	1.31371	0.0269866	2.48101	1.31093	C05356	HMDB0001193	Lipids and lipid-like molecules
	15-OxoETE	gcgr:WT	1.65283	9.52e-05	4.70407	2.23391	C04577	HMDB0010210	Lipids and lipid-like molecules
	15(S)-HPETE	gcgr:WT	1.25636	0.000252243	3.10882	1.63637	C05966	HMDB0004244	Lipids and lipid-like molecules
	12-OxoETE	gcgr:WT	1.29905	0.00155338	2.08887	1.06273	C14807	HMDB0013633	Lipids and lipid-like molecules
	12(S)-HPETE	gcgr:WT	1.0228	0.00778897	2.87025	1.52118	C05965	HMDB0004243	Lipids and lipid-like molecules
	11,12,15-THETA	gcgr:WT	1.50833	3.49e-05	3.28528	1.71602	C14782	HMDB0004684	Lipids and lipid-like molecules
	L-Octanoylcarnitine	gcgr:WT	1.32805	0.000369747	1.97153	0.979318	C02838	HMDB0000791	Lipids and lipid-like molecules
	Deoxycholic acid	gcgr:WT	1.19773	0.0031183	0.585686	-0.7718	C04483	HMDB0000626	Lipids and lipid-like molecules
	12(S)-HHT	gcgr:WT	1.51368	2.07e-05	4.2896	2.10084	C20388	HMDB0012535	Lipids and lipid-like molecules
	Pentadecanal	gcgr:WT	1.11333	0.00625276	1.84167	0.881014	C01948	HMDB0031078	Lipids and lipid-like molecules
	1-Tridecanol	gcgr:WT	1.00394	4.21e-05	1.41	0.49569	C14509	HMDB0013316	Lipids and lipid-like molecules
	Carvacrol	gcgr:WT	1.21116	0.000116491	1.60847	0.685687	C09840	HMDB0035770	Lipids and lipid-like molecules
	Methyl palmitate	gcgr:WT	1.35294	0.00242223	0.483917	-1.04717	C16995	HMDB0061859	Lipids and lipid-like molecules
	9E-Heptadecenoic acid	gcgr:WT	1.28198	0.0011749	0.613853	-0.704035	C16536	HMDB0031046	Lipids and lipid-like molecules
	Glycolithocholate	gcgr:WT	1.14572	4.69e-05	0.645208	-0.632165	C15557	HMDB0000698	Lipids and lipid-like molecules
	LysoPC(16:0)	gcgr:WT	1.10404	0.000146908	2.02484	1.01781	C04102	HMDB0062541	Lipids and lipid-like molecules
	Trypanothiondisulfid	gcgr:WT	1.5352	0.00433203	0.371169	-1.42985	C03170	HMDB0060521	Organic acids and derivatives
	N(Z)-Acetyllysine	gcgr:WT	1.37597	0.00128308	0.472109	-1.08281	C02727	HMDB0000206	Organic acids and derivatives
	Glutamylgaba	gcgr:WT	1.16772	0.000101486	1.69334	0.759871	C15767	HMDB0012161	Organic acids and derivatives
	2-aceto-2-hydroxy-butyrate	gcgr:WT	1.47137	0.000462696	2.29594	1.19909	C06006	HMDB0006900	Organic acids and derivatives
	Phenylacetylglycine	gcgr:WT	1.56749	0.00412841	0.502953	-0.991504	C05598	HMDB0000821	Organic acids and derivatives
	Nicotinurate	gcgr:WT	1.20383	0.00269449	1.6645	0.735091	C05380	HMDB0003269	Organic acids and derivatives
	L-Lysine	gcgr:WT	1.33278	0.00663622	0.238069	-2.07055	C00047	HMDB0000182	Organic acids and derivatives
	L-Homocystine	gcgr:WT	1.09551	5.52e-05	0.644904	-0.632845	C01817	HMDB0000575	Organic acids and derivatives
	L-Aspartate	gcgr:WT	1.03041	0.000391404	2.7324	1.45017	C00049	HMDB0000191	Organic acids and derivatives
	L-Asparagine	gcgr:WT	1.08024	0.00685284	0.355096	-1.49372	C00152	HMDB0000168	Organic acids and derivatives
	L-Arginine	gcgr:WT	1.28057	0.00165411	0.250661	-1.99619	C00062	HMDB0000517	Organic acids and derivatives
	Fumarate	gcgr:WT	1.09571	0.00339639	2.84542	1.50864	C00122	HMDB0000134	Organic acids and derivatives
	Stearamide	gcgr:WT	1.65218	0.0060685	0.358379	-1.48044	C13846	HMDB0034146	Organic acids and derivatives
	Fenmetrazin	gcgr:WT	1.51402	4.59e-05	2.32091	1.21469	C05284	HMDB0006773	Organoheterocyclic compounds
	Skatole	gcgr:WT	1.18703	0.00421639	0.525185	-0.929101	C08313	HMDB0000466	Organoheterocyclic compounds
	Serotonin	gcgr:WT	1.21046	0.00753411	0.293908	-1.76656	C00780	HMDB0000259	Organoheterocyclic compounds
	Protoporphyrin	gcgr:WT	1.61832	0.000534474	0.351079	-1.51013	C02191	HMDB0000241	Organoheterocyclic compounds
	N-Acetylserotonin	gcgr:WT	2.07643	0.00363274	0.290033	-1.78571	C00978	HMDB0001238	Organoheterocyclic compounds
	Melatonin	gcgr:WT	1.49291	0.000270734	0.485377	-1.04282	C01598	HMDB0001389	Organoheterocyclic compounds
	L-Urobilinogen	gcgr:WT	1.42009	0.00429032	0.159777	-2.64586	C05789	HMDB0004157	Organoheterocyclic compounds
	I-Urobilinogen	gcgr:WT	1.68917	0.00495806	0.0943385	-3.40601	C05790	HMDB0001898	Organoheterocyclic compounds
	Indole-3-ethanol	gcgr:WT	1.3304	0.000368912	0.593774	-0.752013	C00955	HMDB0003447	Organoheterocyclic compounds
	Coproporphyrinogen I	gcgr:WT	1.5858	0.00402524	0.083937	-3.57455	C05768	HMDB0002158	Organoheterocyclic compounds
	6-Hydroxymelatonin	gcgr:WT	1.39826	0.000167827	0.277796	-1.8479	C05643	HMDB0004081	Organoheterocyclic compounds
	3-Methyldioxyindole	gcgr:WT	1.43255	0.000829988	0.499179	-1.00237	C05834	HMDB0004186	Organoheterocyclic compounds
	3-Methyladenine	gcgr:WT	1.05238	0.0038946	1.7098	0.77383	C00913	HMDB0011600	Organoheterocyclic compounds
	Formyl-5-hydroxykynurenamine	gcgr:WT	1.6372	0.00322627	0.419984	-1.25159	C05647	HMDB0012948	Organic oxygen compounds
	1PMT-Ribulose	gcgr:WT	1.12037	0.00180679	1.71898	0.781554	C04582	HMDB0001299	Organic oxygen compounds
	Galactitol	gcgr:WT	1.00971	0.00178715	1.55231	0.63442	C01697	HMDB0000107	Organic oxygen compounds
	4-Methylpentanal	gcgr:WT	1.37176	0.000591609	0.490595	-1.02739	C02373	HMDB0001318	Organic oxygen compounds
	Porphobilinogen	gcgr:WT	2.19125	0.00512187	0.215204	-2.21622	C00931	HMDB0000245	Organic nitrogen compounds
	Phytosphingosine	gcgr:WT	1.88805	0.000157649	3.85936	1.94836	C12144	HMDB0004610	Organic nitrogen compounds
	L-Histidinol	gcgr:WT	1.6481	2.99e-06	2.45386	1.29505	C00860	HMDB0003431	Organic nitrogen compounds
	Cytidine	gcgr:WT	1.53301	0.000399638	0.16096	-2.63522	C00475	HMDB0000089	Nucleosides, nucleotides, and analogues
	Uridine	gcgr:WT	1.16773	2.76e-05	1.84193	0.881215	C00299	HMDB0000296	Nucleosides, nucleotides, and analogues
	Orthophosphate	gcgr:WT	1.00162	0.00612204	0.693742	-0.52753	C00009	HMDB0002142	Homogeneous non-metal compounds
Lipidomics	DG(36:4)	gcgr:WT	1.66397	0.0165212	1.79438	0.843487	LMGL02010070	HMDB0007112	Lipids and lipid-like molecules
	DG(44:9)	gcgr:WT	1.84513	0.000103084	1.699	0.764687	LMGL02010301	HMDB0007700	Lipids and lipid-like molecules
	DG(36:3)	gcgr:WT	1.50491	0.0293352	1.69216	0.758864	LMGL02010057	HMDB0007163	Lipids and lipid-like molecules
	DG(42:2)	gcgr:WT	1.36989	0.00125104	1.37156	0.455818	LMGL02010219	HMDB0007434	Lipids and lipid-like molecules
	DG(42:9)	gcgr:WT	1.08597	0.000599833	1.27923	0.355275	LMGL02010274	HMDB0007582	Lipids and lipid-like molecules
	DG(18:1_18:2)	gcgr:WT	1.00878	0.000496903	0.832179	-0.265035	LMGL02010056	HMDB0007219	Lipids and lipid-like molecules
	DG(34:2)	gcgr:WT	1.09461	0.000806082	0.820784	-0.284926	LMGL02010390	HMDB0007022	Lipids and lipid-like molecules
	DG(36:5)	gcgr:WT	1.19618	0.000116704	0.790614	-0.338955	LMGL02010077	HMDB0007141	Lipids and lipid-like molecules
	DG(32:1)	gcgr:WT	1.22227	0.00105736	0.785492	-0.348332	LMGL02010384	HMDB0007015	Lipids and lipid-like molecules
	DG(32:0)	gcgr:WT	1.21156	0.00109526	0.77683	-0.364328	LMGL02010009	HMDB0007098	Lipids and lipid-like molecules
	TG(56:8)	gcgr:WT	1.49497	0.0300389	1.68379	0.751708	LMGL03010801	HMDB05392	Lipids and lipid-like molecules
	TG(56:7)	gcgr:WT	1.42642	0.02984	1.59094	0.669875	LMGL03010748	HMDB10464	Lipids and lipid-like molecules
	TG(60:3)	gcgr:WT	1.38739	0.0282143	1.54697	0.629445	LMGL03011349	HMDB0051478	Lipids and lipid-like molecules
	TG(58:4)	gcgr:WT	1.34997	0.0239173	1.48655	0.571969	LMGL03013105	HMDB0045601	Lipids and lipid-like molecules
	TG(58:6)	gcgr:WT	1.11901	0.00152664	0.796495	-0.328262	LMGL03011221	HMDB10467	Lipids and lipid-like molecules
	TG(62:7)	gcgr:WT	1.27807	0.000282546	0.766122	-0.384354	LMGL03011982	HMDB0046744	Lipids and lipid-like molecules
	PC(44:8)	gcgr:WT	1.14965	4.46e-07	1.47955	0.565158	LMGP01012095	HMDB0008646	Lipids and lipid-like molecules
	PC(42:5)	gcgr:WT	1.0949	6.79e-06	1.44285	0.528921	LMGP01011951	HMDB0008512	Lipids and lipid-like molecules
	PC(42:11)	gcgr:WT	1.07652	0.000316289	1.39277	0.477962	LMGP01011059	HMDB0008518	Lipids and lipid-like molecules
	PC(36:6)	gcgr:WT	1.30833	0.00434056	1.30508	0.384141	LMGP01010512	HMDB0007892	Lipids and lipid-like molecules
	PC(38:8)	gcgr:WT	1.20398	0.00636624	1.2704	0.34528	LMGP01011693	HMDB0008215	Lipids and lipid-like molecules
	PC(O-40:4)	gcgr:WT	1.1499	0.00157794	1.25219	0.324458	LMGP01020238	HMDB0013442	Lipids and lipid-like molecules
	PC(P-36:3)	gcgr:WT	1.23211	9.41e-08	1.23887	0.309026	LMGP01030059	HMDB0011245	Lipids and lipid-like molecules
	PC(37:2)	gcgr:WT	1.12317	0.000456907	1.22776	0.296026	LMGP01011428	HMDB0007954	Lipids and lipid-like molecules
	PC(40:5)	gcgr:WT	1.11892	0.00222083	1.22178	0.28898	LMGP01012191	HMDB0008343	Lipids and lipid-like molecules
	PC(44:6)	gcgr:WT	1.04572	0.00144458	1.21648	0.282713	LMGP01012003	HMDB0008551	Lipids and lipid-like molecules
	PC(O-40:6)	gcgr:WT	1.05383	0.00763652	1.20177	0.265162	LMGP01020110	HMDB0013422	Lipids and lipid-like molecules
	PC(42:8)	gcgr:WT	1.05923	0.000356769	1.20074	0.263922	LMGP01011865	HMDB0008354	Lipids and lipid-like molecules
	PC(30:0)	gcgr:WT	1.1228	0.00108342	0.811229	-0.301819	LMGP01010481	HMDB0007869	Lipids and lipid-like molecules
	PC(P-32:1)	gcgr:WT	1.03471	0.0139158	0.595939	-0.746762	LMGP01030133	HMDB0011269	Lipids and lipid-like molecules
	PC(32:0)	gcgr:WT	1.30228	1.47e-05	0.593266	-0.753249	LMGP01010564	HMDB0000564	Lipids and lipid-like molecules
	PS(44:8)	gcgr:WT	1.28331	3.01e-06	1.71285	0.776402	LMGP03010816	HMDB0112810	Lipids and lipid-like molecules
	PS(42:5)	gcgr:WT	1.2767	1e-07	1.59009	0.669107	LMGP03010778	HMDB0116779	Lipids and lipid-like molecules
	PS(40:6)	gcgr:WT	1.2738	5.55e-06	1.55206	0.634183	LMGP03010800	HMDB0112796	Lipids and lipid-like molecules
	PS(42:8)	gcgr:WT	1.14879	4.77e-05	1.47005	0.555865	LMGP03010810	HMDB0112805	Lipids and lipid-like molecules
	PS(40:1)	gcgr:WT	1.51676	9.43e-07	1.37921	0.463838	LMGP03010945	HMDB0112714	Lipids and lipid-like molecules
	PS(42:2)	gcgr:WT	1.37924	0.00869053	1.36809	0.452158	LMGP03010526	HMDB0112533	Lipids and lipid-like molecules
	PS(44:6)	gcgr:WT	1.39495	0.000410898	1.35964	0.443224	LMGP03010842	HMDB0116792	Lipids and lipid-like molecules
	PS(40:8)	gcgr:WT	1.03034	0.014238	1.23884	0.308987	LMGP03010979	HMDB0012406	Lipids and lipid-like molecules
	PS(40:2)	gcgr:WT	1.16321	0.00326556	0.775079	-0.367585	LMGP03010947	HMDB0112525	Lipids and lipid-like molecules
	PS(32:5)	gcgr:WT	2.11969	0.000151047	0.498084	-1.00554	LMGP03010124	HMDB0112309	Lipids and lipid-like molecules
	PE(40:0)	gcgr:WT	1.91562	0.0159166	1.90963	0.933294	LMGP02011162	HMDB0009486	Lipids and lipid-like molecules
	PE(P-38:4)	gcgr:WT	1.07838	0.000170559	1.46041	0.546369	LMGP02030003	HMDB0005779	Lipids and lipid-like molecules
	PE(42:6)	gcgr:WT	1.46085	0.0021645	1.37212	0.456409	LMGP02011150	HMDB0009691	Lipids and lipid-like molecules
	PE(42:5)	gcgr:WT	1.32427	7.76e-06	1.30247	0.381255	LMGP02010869	HMDB0009273	Lipids and lipid-like molecules
	PE(42:3)	gcgr:WT	1.03007	0.00537712	1.22306	0.290491	LMGP02011032	HMDB0009497	Lipids and lipid-like molecules
	PE(38:0)	gcgr:WT	1.10127	0.00204007	1.21366	0.279367	LMGP02010132	HMDB0008940	Lipids and lipid-like molecules
	PE(44:0)	gcgr:WT	1.30395	6.51e-05	0.761727	-0.392655	LMGP02010167	HMDB0009724	Lipids and lipid-like molecules
	PE(46:1)	gcgr:WT	1.50847	0.00014501	0.696738	-0.521311	LMGP02010292	HMDB0009509	Lipids and lipid-like molecules
	PE(38:6)	gcgr:WT	1.32251	0.0270652	0.638425	-0.64741	LMGP02011161	HMDB0009682	Lipids and lipid-like molecules
	PI(38:2)	gcgr:WT	1.26837	5.74e-05	1.27179	0.346858	LMGP06010324	HMDB0009851	Lipids and lipid-like molecules
	LPE(20:1)	gcgr:WT	1.82978	0.00119973	0.552399	-0.856216	LMGP02050046	HMDB0011482	Lipids and lipid-like molecules
	LPE(16:0)	gcgr:WT	2.04218	6.53e-05	0.535177	-0.901913	LMGP02050002	HMDB0011503	Lipids and lipid-like molecules
	LPE(20:0)	gcgr:WT	1.42196	0.000781589	0.525537	-0.928136	LMGP02050045	HMDB0011481	Lipids and lipid-like molecules
	LPE(20:4)	gcgr:WT	1.54101	0.000649002	0.476086	-1.0707	LMGP02050067	HMDB0011518	Lipids and lipid-like molecules
	LPE(18:0)	gcgr:WT	1.69017	0.000132765	0.418407	-1.25702	LMGP02050038	HMDB0011129	Lipids and lipid-like molecules
	LPE(18:1)	gcgr:WT	1.75607	6.81e-05	0.390848	-1.35532	LMGP02050064	HMDB0011505	Lipids and lipid-like molecules
	LPE(22:4)	gcgr:WT	1.79872	0.000428119	0.362295	-1.46476	LMGP02050057	HMDB0011493	Lipids and lipid-like molecules
	LPE(20:3)	gcgr:WT	1.91524	9.66e-06	0.328238	-1.60718	LMGP02050022	HMDB0011516	Lipids and lipid-like molecules
	LPE(18:2)	gcgr:WT	1.96611	6.1e-05	0.306583	-1.70565	LMGP02050011	HMDB0011507	Lipids and lipid-like molecules
	LPE(18:3)	gcgr:WT	1.99006	9.71e-05	0.302068	-1.72705	LMGP02050029	HMDB0011509	Lipids and lipid-like molecules
	LPE(22:5)	gcgr:WT	1.97431	3.69e-05	0.285916	-1.80634	LMGP02050069	HMDB0011524	Lipids and lipid-like molecules
	LPC(18:1)	gcgr:WT	1.74786	6.89e-05	0.622178	-0.6846	LMGP01050138	HMDB0010385	Lipids and lipid-like molecules
	LPC(18:2)	gcgr:WT	1.81417	8.45e-05	0.603273	-0.729118	LMGP01050035	HMDB0010386	Lipids and lipid-like molecules
	LPC(20:1)	gcgr:WT	2.25612	2.46e-06	0.48107	-1.05568	LMGP01050131	HMDB0010391	Lipids and lipid-like molecules
	LPC(P-16:0)	gcgr:WT	1.75623	0.000592896	0.375109	-1.41462	LMGP01070006	HMDB0010407	Lipids and lipid-like molecules
	LPC(20:2)	gcgr:WT	1.8216	0.000253186	0.352498	-1.50431	LMGP01050132	HMDB0010392	Lipids and lipid-like molecules
	LPC(14:0)	gcgr:WT	1.95964	0.000626481	0.311635	-1.68207	LMGP01050012	HMDB0010379	Lipids and lipid-like molecules
	LPC(P-18:1)	gcgr:WT	1.92436	0.000512152	0.281991	-1.82628	LMGP01070012	HMDB0010408	Lipids and lipid-like molecules
	LPC(P-18:0)	gcgr:WT	2.06139	0.00735376	0.26587	-1.91121	LMGP01070009	HMDB0013122	Lipids and lipid-like molecules
	LPC(16:0)	gcgr:WT	2.22544	0.00276563	0.232977	-2.10174	LMGP01050018	HMDB0010382	Lipids and lipid-like molecules
	LPA(16:0)	gcgr:WT	1.78125	3.46e-05	0.372175	-1.42595	LMGP10050006	HMDB07853	Lipids and lipid-like molecules
	LPA(20:3)	gcgr:WT	1.5187	3.12e-07	0.718279	-0.477384	LMGP10050028	HMDB0062313	Lipids and lipid-like molecules
	LPA(20:4)	gcgr:WT	1.43485	0.000781262	0.696713	-0.521363	LMGP10050013	HMDB0062312	Lipids and lipid-like molecules
	LPA(20:1)	gcgr:WT	1.70406	2.84e-05	0.643816	-0.63528	LMGP10050026	HMDB0062305	Lipids and lipid-like molecules
	LPI(18:0)	gcgr:WT	1.42433	0.0290431	0.485027	-1.04386	LMGP06050004	HMDB0240261	Lipids and lipid-like molecules
	PC(O-18:0)	gcgr:WT	2.26517	7.09e-06	0.464411	-1.10653	LMGP01020046	HMDB0062195	Lipids and lipid-like molecules
	PC(O-20:1)	gcgr:WT	2.35037	1.58e-06	0.447898	-1.15876	LMGP01020154	HMDB0011148	Lipids and lipid-like molecules
	CDP-DG(34:2)	gcgr:WT	1.18077	0.0102799	1.80214	0.84971	LMGP13010007	HMDB0006972	Lipids and lipid-like molecules
	n-Butyl Oleate	gcgr:WT	1.56023	0.000770991	1.47337	0.559124	LMFA07010975	HMDB0062659	Lipids and lipid-like molecules
	5-Demethoxyubiquinone-10	gcgr:WT	1.36762	0.0043355	0.687453	-0.540667	LMPR02010032	HMDB0060251	Lipids and lipid-like molecules
	Testosterone glucuronide	gcgr:WT	1.57596	3.35e-06	0.681618	-0.552964	LMST05010012	HMDB0003193	Lipids and lipid-like molecules
	Taurocholic Acid	gcgr:WT	1.679	0.000107811	0.629731	-0.667192	LMST05040001	HMDB0000036	Lipids and lipid-like molecules
	17-HDHA	gcgr:WT	1.54635	4.33e-05	0.479395	-1.06071	LMFA04000032	HMDB0010213	Lipids and lipid-like molecules
	32-hydroxylanosterol	gcgr:WT	2.60642	1.38e-08	0.386552	-1.37127	LMST01010124	HMDB01242	Lipids and lipid-like molecules
	tetracosahexaenoic acid	gcgr:WT	1.80203	0.00137782	0.352035	-1.50621	LMFA01030804	HMDB02007	Lipids and lipid-like molecules
	3-Hydroxymyristoylcarnitine	gcgr:WT	2.01917	0.000225908	0.278581	-1.84383	LMFA07070045	HMDB0061640	Lipids and lipid-like molecules
